# Supplementary material for: Investigation of the Chemical Composition, Antihyperglycemic and Antilipidemic Effects of Bassia eriophora and Its Derived Constituent, Umbelliferone on High-Fat Diet and Streptozotocin-Induced Diabetic Rats
Source: MDPI journal article supplement (doi:10.3390/molecules27206941), 2022-10-16
Supplement: s1 [file s1]

**Title**

**Investigation of the chemical composition, antihyperglycemic and antilipidemic effects of *Bassia eriophora* and its derived constituent, Umbelliferone on high fat diet-streptozotocin induced diabetic rats**

**Supplementary-S1-S6: 1D- and 2D- NMR  
spectroscopic data of pure isolated compound  
umbelliferone**

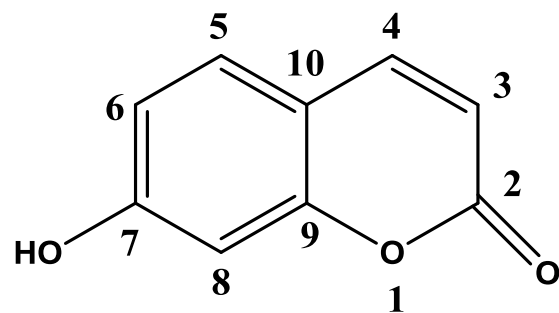

Structure of pure isolated umbelliferone .

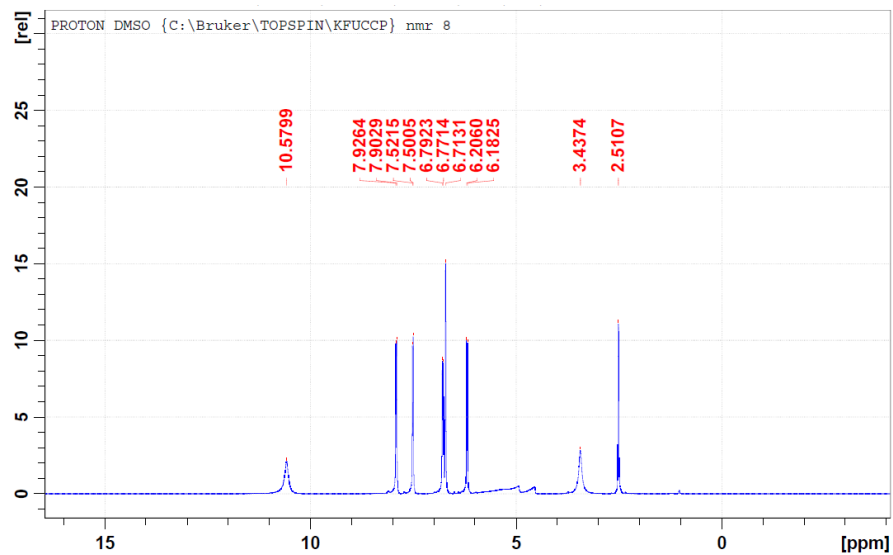

**Figure S1 :  $^1\text{H}$ -NMR full spectrum of umbelliferone (400 MHz, DMSO- $d_6$ )**

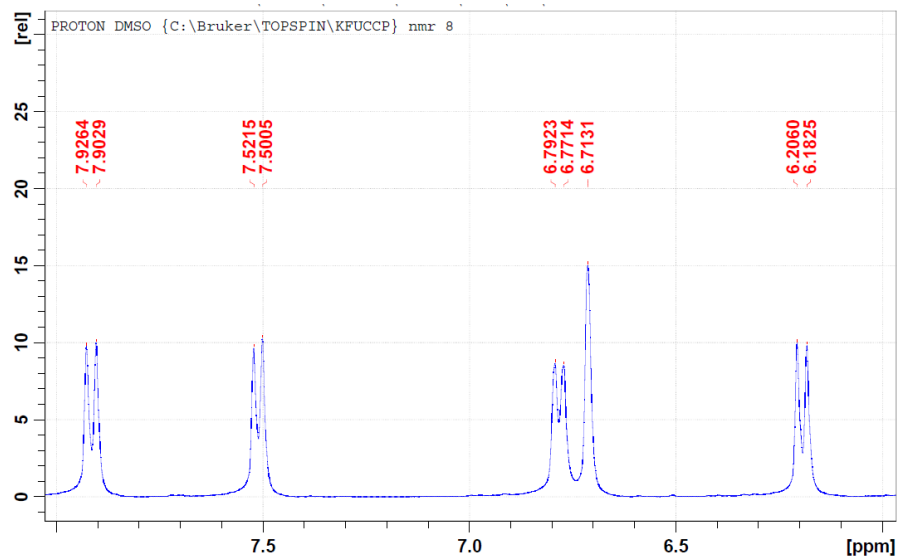

**Figure S2:  $^1\text{H}$ -NMR expanded spectrum of umbelliferone (400 MHz, DMSO- $d_6$ )**

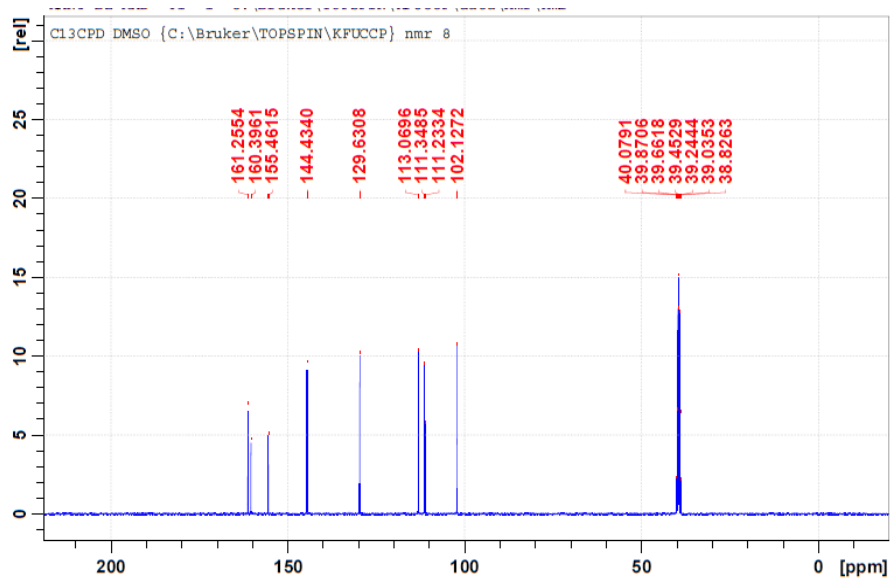

**Figure S3:  $^{13}\text{C}$ -NMR spectrum of umbelliferone (100 MHz, DMSO- $d_6$ )**

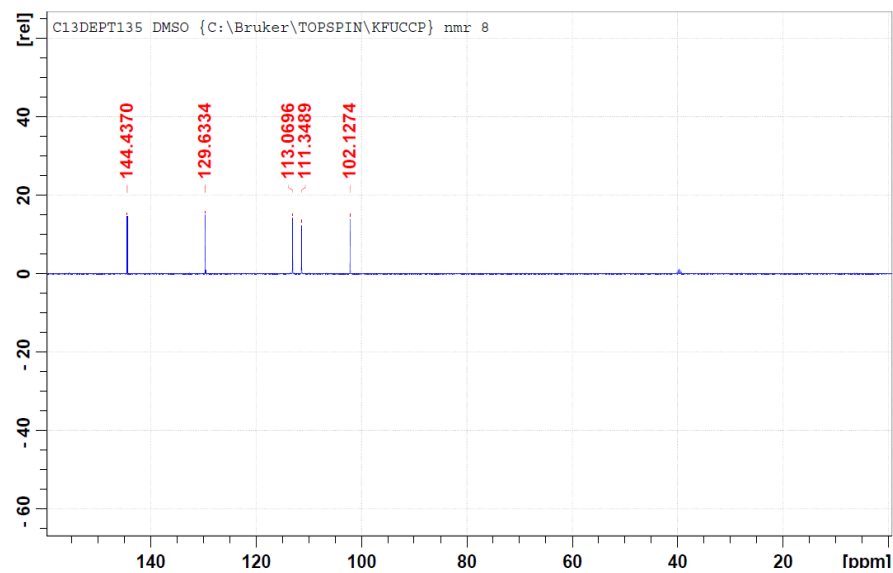

**Figure S4 : DEPT spectrum of umbelliferone (100 MHz, DMSO- $d_6$ )**

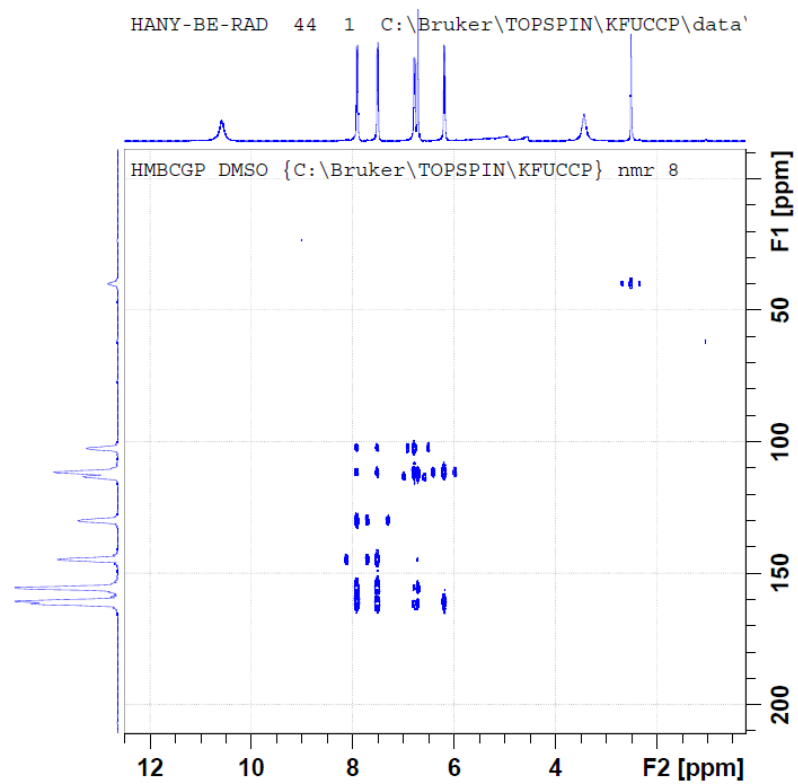

**Figure S5 :HMBC spectrum of umbelliferone (400 MHz, DMSO-d6)**

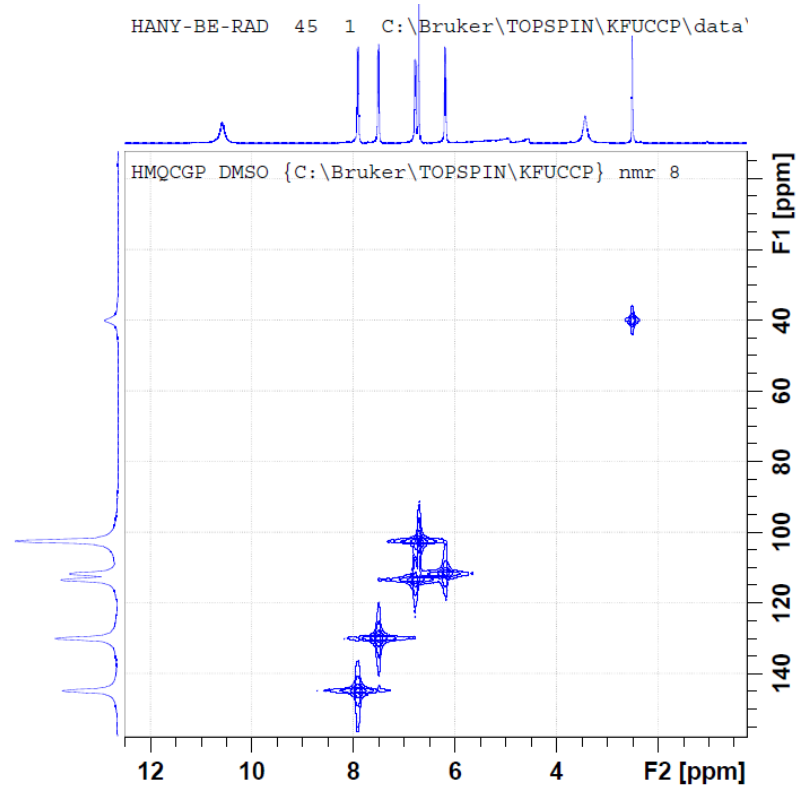

**Figure S6 : HMQC spectrum of umbelliferone (400 MHz, DMSO-d6)**
